# Supplementary material for: Antibacterial studies and statistical design set data of quasi zinc oxide nanostructures
Source: Royal Society of Chemistry journal article supplement (doi:10.1039/c6ra05297e), 2016-01-01
Supplement: c6ra05297e1.pdf [file c6ra05297e1.pdf]

**Electronic Supplementary Informations (ESI)†**

**Antibacterial studies and statistical design set data's of quasi zinc oxide nanostructures**

**Rizwan Wahab<sup>a,b,\*</sup>, Farheen Khan<sup>c</sup>, Yogendra K. Mishra<sup>d</sup>, Javed Musarrat<sup>e</sup> and Abdulaziz A.Al-Khedhairy<sup>b</sup>**

<sup>a</sup>Zoology department, College of Science, King Saud University, Riyadh 11451, Saudi Arabia

<sup>b</sup>Al-Jeraisy, Chair for DNA Research, Department of Zoology, College of Science, King Saud University, Riyadh 11451, Saudi Arabia

<sup>c</sup>Department of Chemistry, Aligarh Muslim University, Aligarh U.P. 202002, India

<sup>d</sup>Functional Nanomaterials, Institute for Materials Science, University of Kiel, Kaiser Str. 2, 24143, Kiel, Germany

<sup>e</sup>Department of Agricultural Microbiology, Faculty of Agricultural Sciences, Aligarh Muslim University, Aligarh 202002, India.

\*Corresponding author E-mail: [rwahab05@gmail.com](mailto:rwahab05@gmail.com), [rwahab@ksu.edu.sa](mailto:rwahab@ksu.edu.sa)

Ph: +966-5360-23284

## **Electronic Supplementary Informations (ESI)†**

### **1. Optimization and validation of solution with analytical techniques**

A method validation studies, including the prerequisites, assumptions and formulae used in the design of an experimental plan. The validation method should be applied to analytical techniques and verify the method works reliably in their hands. Typical validation parameters are described and calculated with the help of analytical studies for example<sup>1</sup>.

- Linearity
- Range
- Accuracy
- Precision
- Limits of detection and quantitation

#### **(a) Linearity:**

Linearity demonstrated by the using a minimum of five standards whose concentration span 80-120% of the expected concentration range. The linearity of a method should be established by the inspection of the plot of the instrumental response versus the initial concentration of analyte and evaluated by appropriate statistical methods. The calculation of the regression line using least square method were record the important executive recognition such as the slope of regression line, intercept, correlation coefficient ( $r^2$ ) and residual sum of squares.

#### **(b) Range:**

The specified range is consequent from the linearity studies. The range of the proposed procedure is the interval between the upper and lower concentration (amount) of analyte in the sample and covered the target amount in the operational samples to be measured. The range established by analytical method has proper levels of precision, accuracy and linearity.

**(c) Accuracy:**

The accuracy is defined as closeness of the test result to the true value. Accuracy analyzed known concentrations of sample solution minimum at three concentration level covering the precise range.

**(d) Precision:**

According to International conference on harmonization (ICH), the precision is the closeness of agreement between a series of measurements obtained from multiple sampling of the same identical sample under the prescribed conditions and may be considered at three levels such as repeatability, intermediate precision and reproducibility.

**(e) Limits of detection and quantitation:**

The lowest concentration of analyte in sample solution can be detected and determine by limit of detection (LOD). Limit of detection “limit test” parameter not to be quantified but it is significantly different from that of a blank. On the other hand limit of quantitation (LOQ) is a parameter of “determination test” and can be defined as the lowest concentration of the analyte that can be precise and quantified with adequate

precision and accuracy. The most common definition of LOD and LOQ is the analyte concentration for which the signal exceeds that for a realistic analytical blank by three and ten times of the standard deviation, respectively.

Limit of detection 
$$LOD = 3.3 \times \frac{S_0}{b}$$

Limit of quantitation 
$$LOQ = 10 \times \frac{S_0}{b}$$

Where ( $S_0$ ) = Standard deviation of the blank, ( $b$ ) Residual standard deviation (RSD) of the calibration line, or standard deviation of the intercept.

The obtained calibration curve of slope ( $b$ ), and standard deviation of the intercept ( $S_0$ ) analyzed at the time to validate level, acceptable accuracy and precision under the quantified operational conditions of proposed method. The limit of quantitation is around of triple the limit of detection. The analytical method was applied to verify the proposed methods works reliability. Typical validation parameters are used for accurate concentration of analytes (ZnO-nanostructures) or sample solution and calculate with the help of statistical parameters as per guidelines of International Conference of Harmonisation (ICH)<sup>1</sup>.

## **2. Statistical analysis:**

The analytical determination of diverse shaped ZnO nanostructures is used for the antibacterial study and estimated by statistical analysis. The performance of the method appraisal includes the following parameters<sup>2-4</sup>:

- Mean
- Standard deviation & variance
- Relative standard deviation
- Coefficient of correlation
- Regression line
- Variance
- Errors in the slope and the intercept
- Confidence limit for the slope and the intercept

**Mean:**

It is the sum of all the measurements divided by the number of measurements. It is calculated by the following expression:

$$\bar{x} = 1/n \sum_i x_i$$

Standard deviation, variance & standard analytical error.

The most useful measure of spread is the standard deviation, S.D. This is defined by the formula:

$$S.D. = \sqrt{\frac{\sum (x_i - \bar{x})^2}{(n-1)}}$$

The square of S.D. is a very important quantity known as the variance which is useful in propagation of error.

The standard analytical error (SAE) of the mean is calculated by  $SAE = S.D. / \sqrt{n}$

Relative standard deviation.

It is calculated by

$$RSD = \frac{SD}{\bar{x}} \times 100$$

The RSD (also called coefficient of variation), the units of which are percent is an example of relative error.

### **Coefficient of correlation:**

When using instrumental methods, it is necessary to carry out a calibration process by using a series of samples (standard) each having a known concentration of analyte. Linearity is judged by correlation coefficient, 'r', which can be calculated for a calibration curve to ascertain the degree of correlation between the measured instrumental variable and the sample concentration.

$$r = \frac{n\sum x_i y_i - \sum x_i \sum y_i}{\sqrt{[n\sum x_i^2 - (\sum x_i)^2][n\sum y_i^2 - (\sum y_i)^2]}}$$

Where n = number of data points

As a general rule,  $0.90 < r < 0.95$  indicates a fair curve,  $0.95 < r < 0.99$  as a good curve, and  $r > 0.99$  includes excellent linearity.

### **Regression line:**

The best straight line through a series of experimental points is that line for which the sum of the squares of the deviation of the points from the line is minimum. Besides,

determining a straight line, uncertainties in the use of calibration graph for analysis of unknown samples can be specified by this method of least squares. The equation of the straight line is

$$A = a + b C$$

Where  $A$  = instrumental response (i.e. absorbance),  $b$  = slope,  $a$  = intercept,  $C$  = concentration of the standards. To obtain the regression line  $A$  on  $C$ , the slope 'b' of the line and the intercept 'a' on the y-axis are given by the following equations:

$$b = \frac{\sum x_i y_i - [(\sum x_i \sum y_i) / n]}{\sum x_i^2 - [(\sum x_i)^2 / n]}$$

$$a = \bar{y} - b\bar{x}$$

Where  $\bar{x}$  = mean of all the values of  $x_i$  and  $\bar{y}$  = mean of all the values of  $y_i$ .

Errors in the slope and the intercept:

The determination of errors in the slope ( $b$ ) and intercept ( $a$ ) of the regression line may be calculated by first calculating  $S_0$  (standard deviation of the calibration line) from the following equation:

$$S_o = \sqrt{\sum (y_i - \bar{y})^2 / (n - 2)}$$

where  $\bar{y}$  values are obtained from calculated regression line for given values of  $x$ ; once the value  $S_0$  has been obtained, both the standard deviations of the slope  $S_b$  and the intercept  $S_a$  can be obtained from the following equations

$$S_b = S_o \sqrt{\Sigma(x_i - \bar{x})^2}$$

$$S_a = S_o \sqrt{\Sigma x_i^2 / n \Sigma(x_i - \bar{x})^2}$$

Confidence limit for the slope and the intercept:

It determines whether the slope and/or intercept of a line differ significantly from a particular or predicted value. It can be calculated in the following manner:

- $b \pm t S_b$  (for slope)
- $a \pm t S_a$  (for intercept)

where  $t$  = tabulated 't' value at desired confidence level for (n-2) degrees of freedom.

## References

1. International Conference on Harmonisation, Harmonized Tripartite Guideline, *Validation of Analytical Procedures*, Text and Methodology, Q2 (R1), November (2005), [www.ich.Org](http://www.ich.Org).
2. H.T.Karnes, G.Shui and V.P.Shahi, Validation of bioanalytical methods. *Pharm Res.* 1991, **8(4)**, 421-426.
3. G. B. Limentani, M. C. Ringo, F. Ye, M. L. Bergquist, and E. O. MCSorley. Beyond the t-test: Statistical equivalence testing. *Analytical Chemistry* 2005, **77(11)**, 221-226.
4. D.R.Bristol, Probabilities and sample sizes for the two one-sided tests procedure *Commun Statist Theory Meth* 1993, **22(7)**, 1953-1961.
